# Supplementary material
Source: publisher figshare collection journal article supplement (https://tandf.figshare.com/ndownloader/files/21734127)
Supplement: Supplementary file 1 [file 21734127]

Supplementary Information to

First-principles study of structural, elastic, electronic and optical properties of RDX under pressure

Sheng-Hai Zhu a,c, Han Qin [[1]](#footnote-1)**, a,c, Wei Zeng b, Fu-Sheng Liu a,c, Bin Tang d,

Qi-Jun Liu[[2]](#footnote-2)* a,c, Ruo-Xi Li a, Yun-Dan Gan e

a School of Physical Science and Technology, Southwest Jiaotong University, Key Laboratory of Advanced Technologies of Materials, Ministry of Education of China, Chengdu 610031, People’s Republic of China

b Teaching and Research Group of Chemistry, College of Medical Technology, Chengdu University of Traditional Chinese Medicine, Chengdu 610075, People’s Republic of China

c Bond and Band Engineering Group, Sichuan Provincial Key Laboratory (for Universities) of High Pressure Science and Technology, Southwest Jiaotong University, Chengdu 610031, People’s Republic of China

d State Key Laboratory of Solidification Processing, Northwestern Polytechnical University, Xi’an 710072, People’s Republic of China

e Xi’an Modern Chemistry Research Institute, Xi’an 710065, People’s Republic of China

Correspondence about the paper at the following address and e-mail address:

Han Qin

School of Physical Science and Technology, Southwest Jiaotong University, Chengdu, Sichuan 610031, People’s Republic of China

E-mail: [hanqin1108@163.com](mailto:hanqin1108@163.com)

Qi-Jun Liu

School of Physical Science and Technology, Southwest Jiaotong University, Chengdu, Sichuan 610031, People’s Republic of China

E-mail: [qijunliu@home.swjtu.edu.cn](mailto:qijunliu@home.swjtu.edu.cn)





**Fig. S1.** Calculated elastic constants of α-RDX as functions of pressure.





**Fig. S2.** Calculated bulk modulus, shear modulus and Young’s modulus as functions of pressure.





**Fig. S3.** The complex dielectric function of α-RDX for polarization direction (100), (010) and (001) under pressure from 0 to 40 GPa.





**Fig. S4.** The complex refractive index of α-RDX for polarization direction (100), (010) and (001) under pressure from 0 to 40 GPa.





**Fig. S5.** Theoptical reflectivity of α-RDX for polarization direction (100), (010) and (001) under pressure from 0 to 40 GPa.





**Fig. S6.** The energy-loss spectrum of α-RDX for polarization direction (100), (010) and (001) under pressure from 0 to 40 GPa.





**Fig. S7.** The complex conductivity of α-RDX for polarization direction (100), (010) and (001) under pressure from 0 to 40 GPa.

1. ** Corresponding author. E-mail: hanqin1108@163.com [↑](#footnote-ref-1)
2. * Corresponding author. E-mail: qijunliu@home.swjtu.edu.cn [↑](#footnote-ref-2)
